# Supplementary material
Source: PubMed Central journal article supplement (PMC9283375)
Supplement: NIHMS1807322-supplement-2.pdf [file NIHMS1807322-supplement-2.pdf]

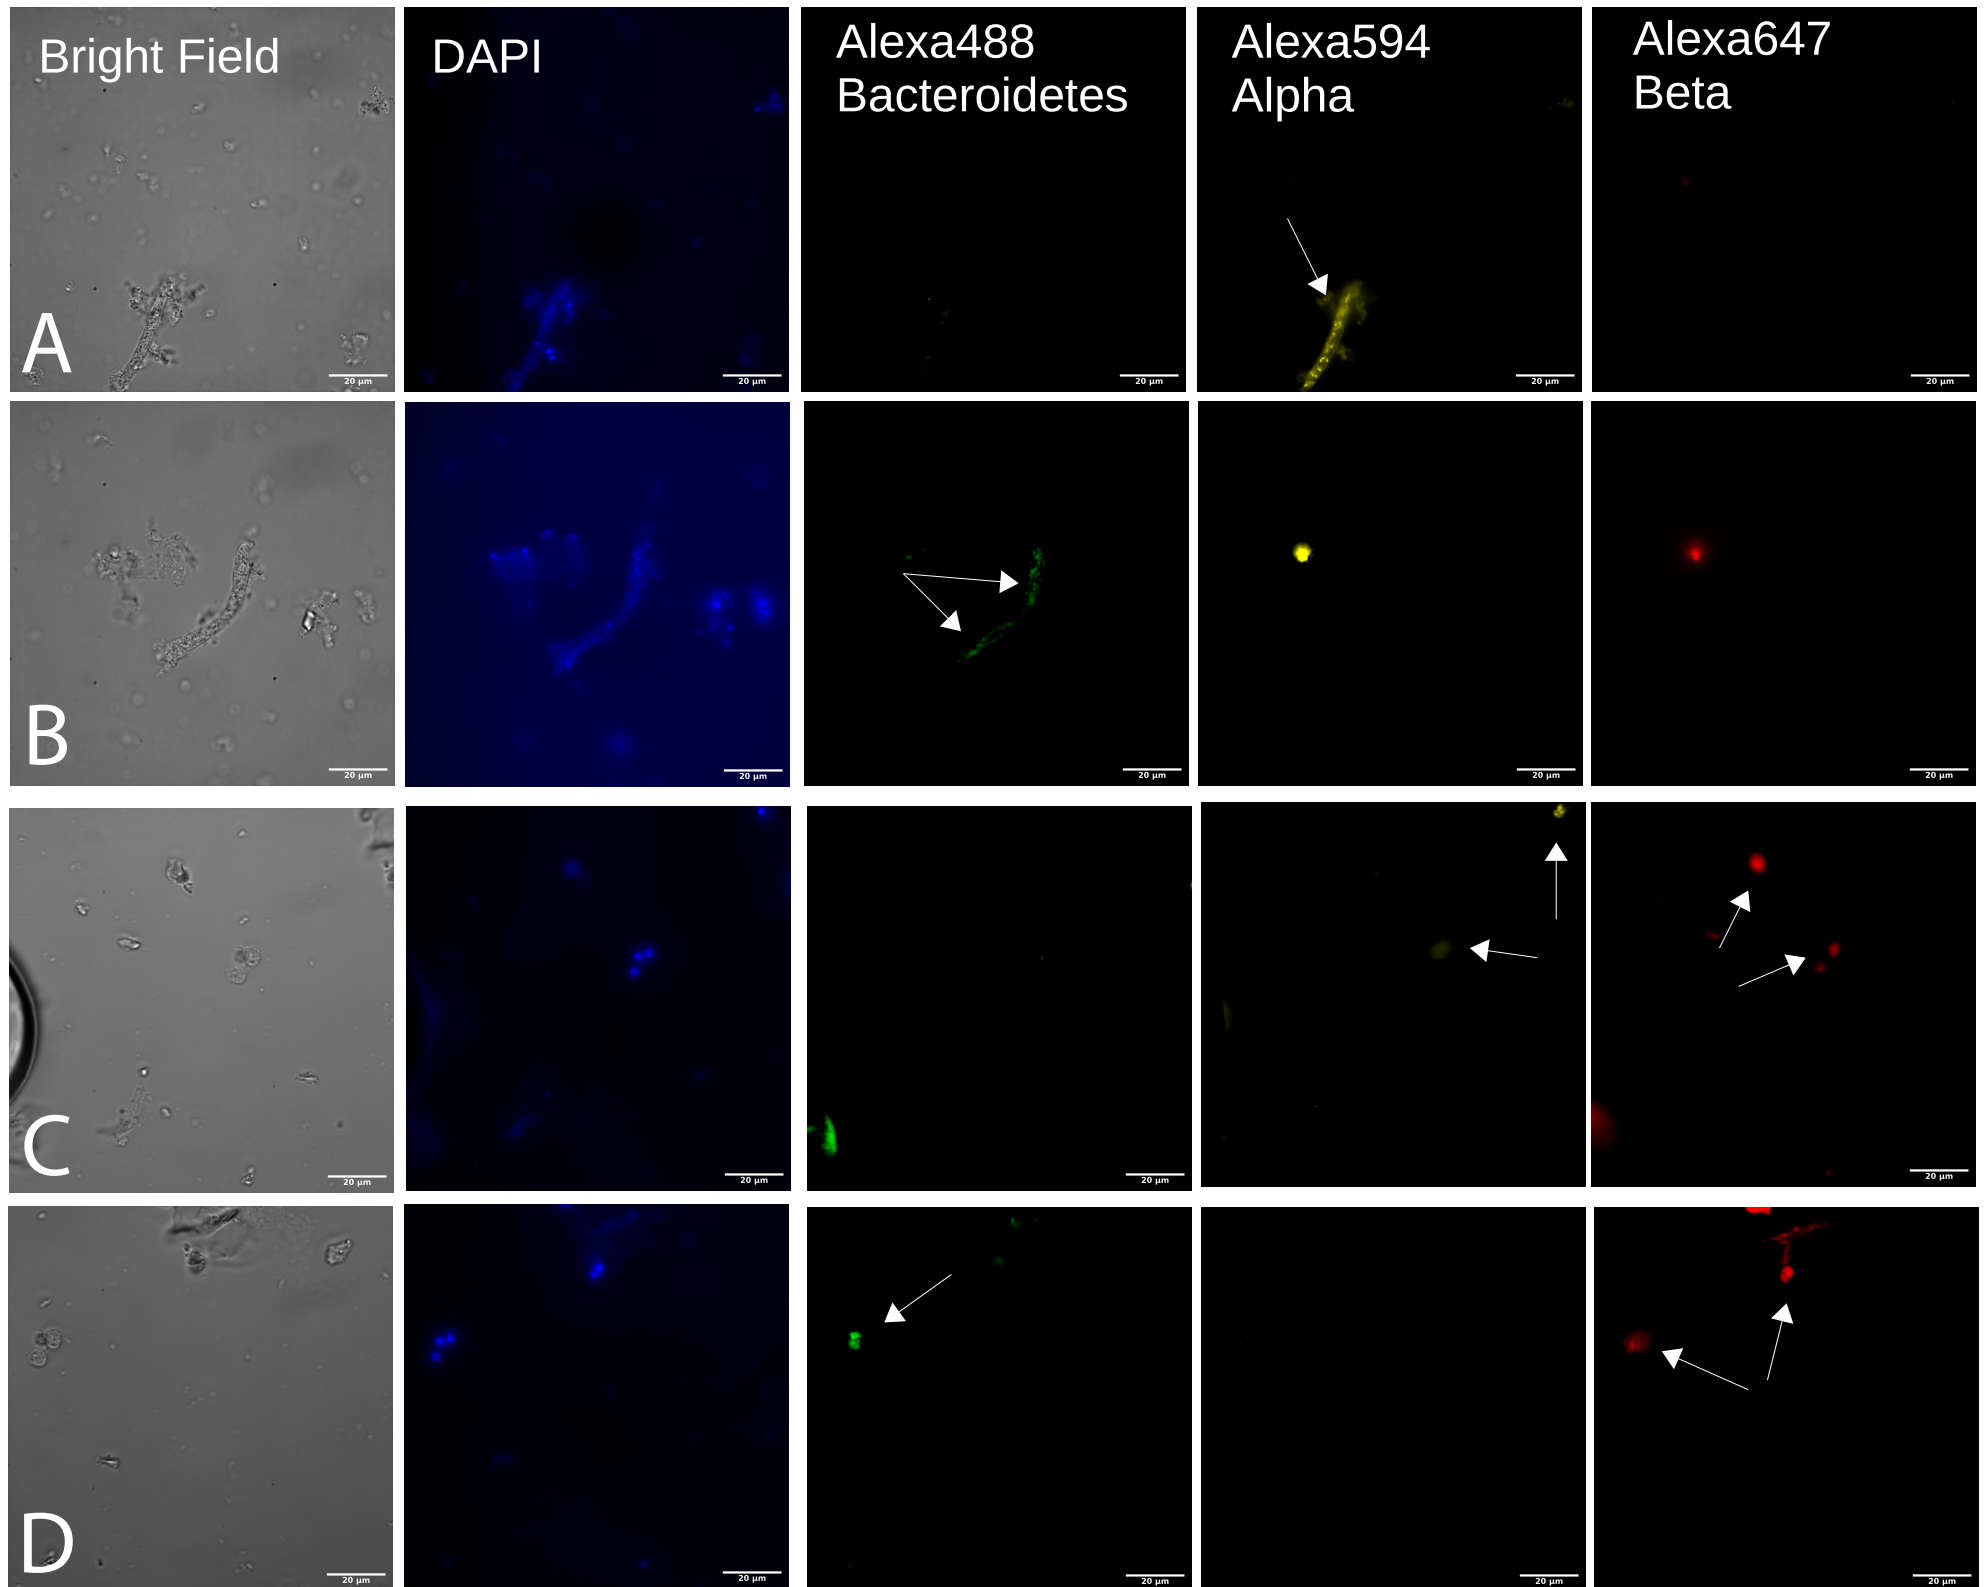

**Figure S1: FISH hybridization microscopy of *Nephromyces* and their endosymbionts.**

**Related to Figure 1.**

The same field of view was imaged under brightfield, 457 nm (DAPI), 488 (bacteroidetes probe), 594 nm (alphaproteobacterial probe), and 647 nm (betaproteobacterial probe). *Nephromyces* cells are indicated by white arrows, whereas fluorescence not indicated by white arrows is from autofluorescence of uric acid crystals in the renal sac. A) Hybridization of the alphaproteobacteria probe. Row B) Hybridization of the bacteroidetes probe. Row C) Hybridization of the alphaproteobacteria and betaproteobacterial probes in the same field of view localized to different *Nephromyces* cells. Row D) Hybridization of the bacteroidetes and betaproteobacterial probes in the same field of view localized to different *Nephromyces* cells. Photos taken on an Olympus BX51 upright compound microscope at 100x magnification images edited in imageJ.

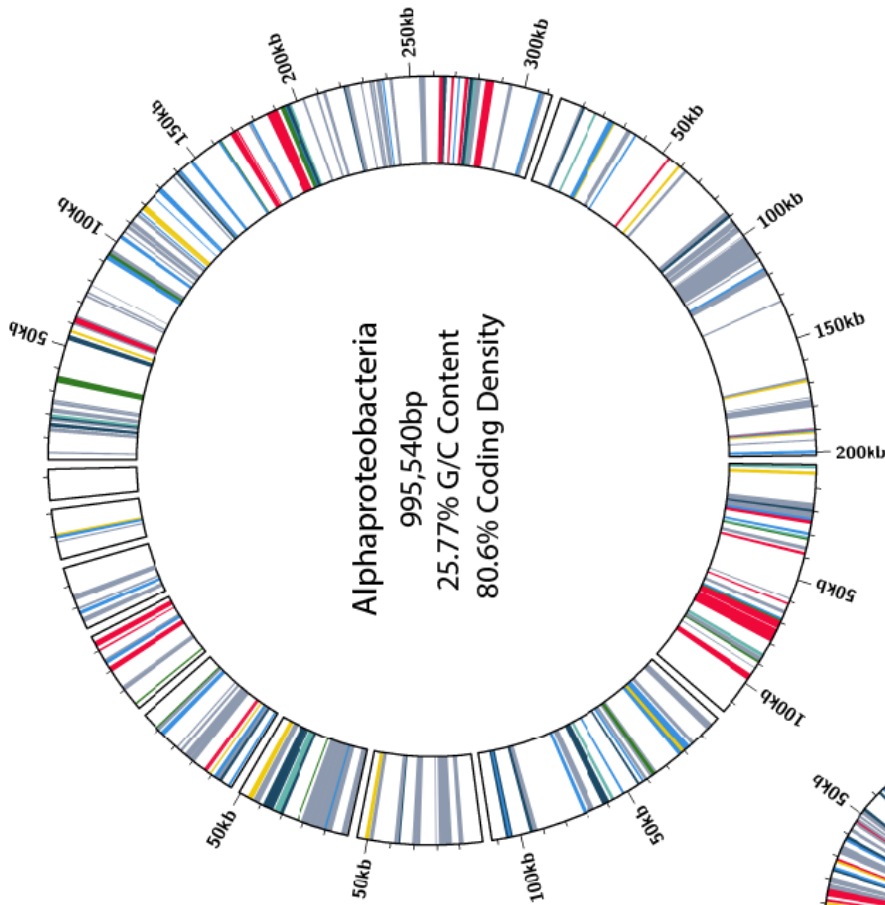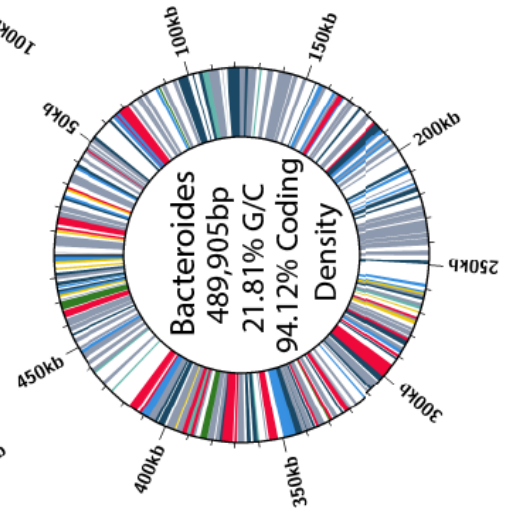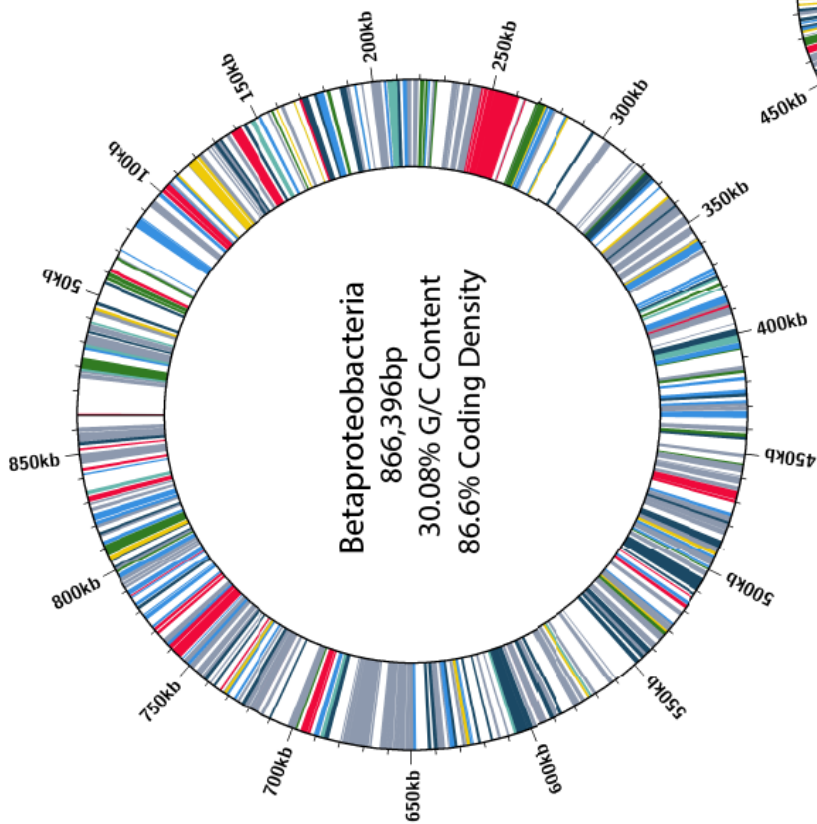

- Carbohydrate metabolism
- Amino acid metabolism
- Lipid metabolism
- Nucleic acid metabolism
- Energy metabolism
- Vitamin and cofactor metabolism
- General housekeeping genes

**Figure S2: Bacterial Endosymbiont Genomes. Related to Figure 2 & 3.**

Circos diagram of bacterial endosymbionts from *Nephromyces*, showing overview of major functional categories (as predicted by KEGG), GC content, size, and coding density. Genomes are scaled relative to each other. The Alphaproteobacteria has not been assembled into a single molecule, and we show the size distribution of the 11 contigs making up this assembly.

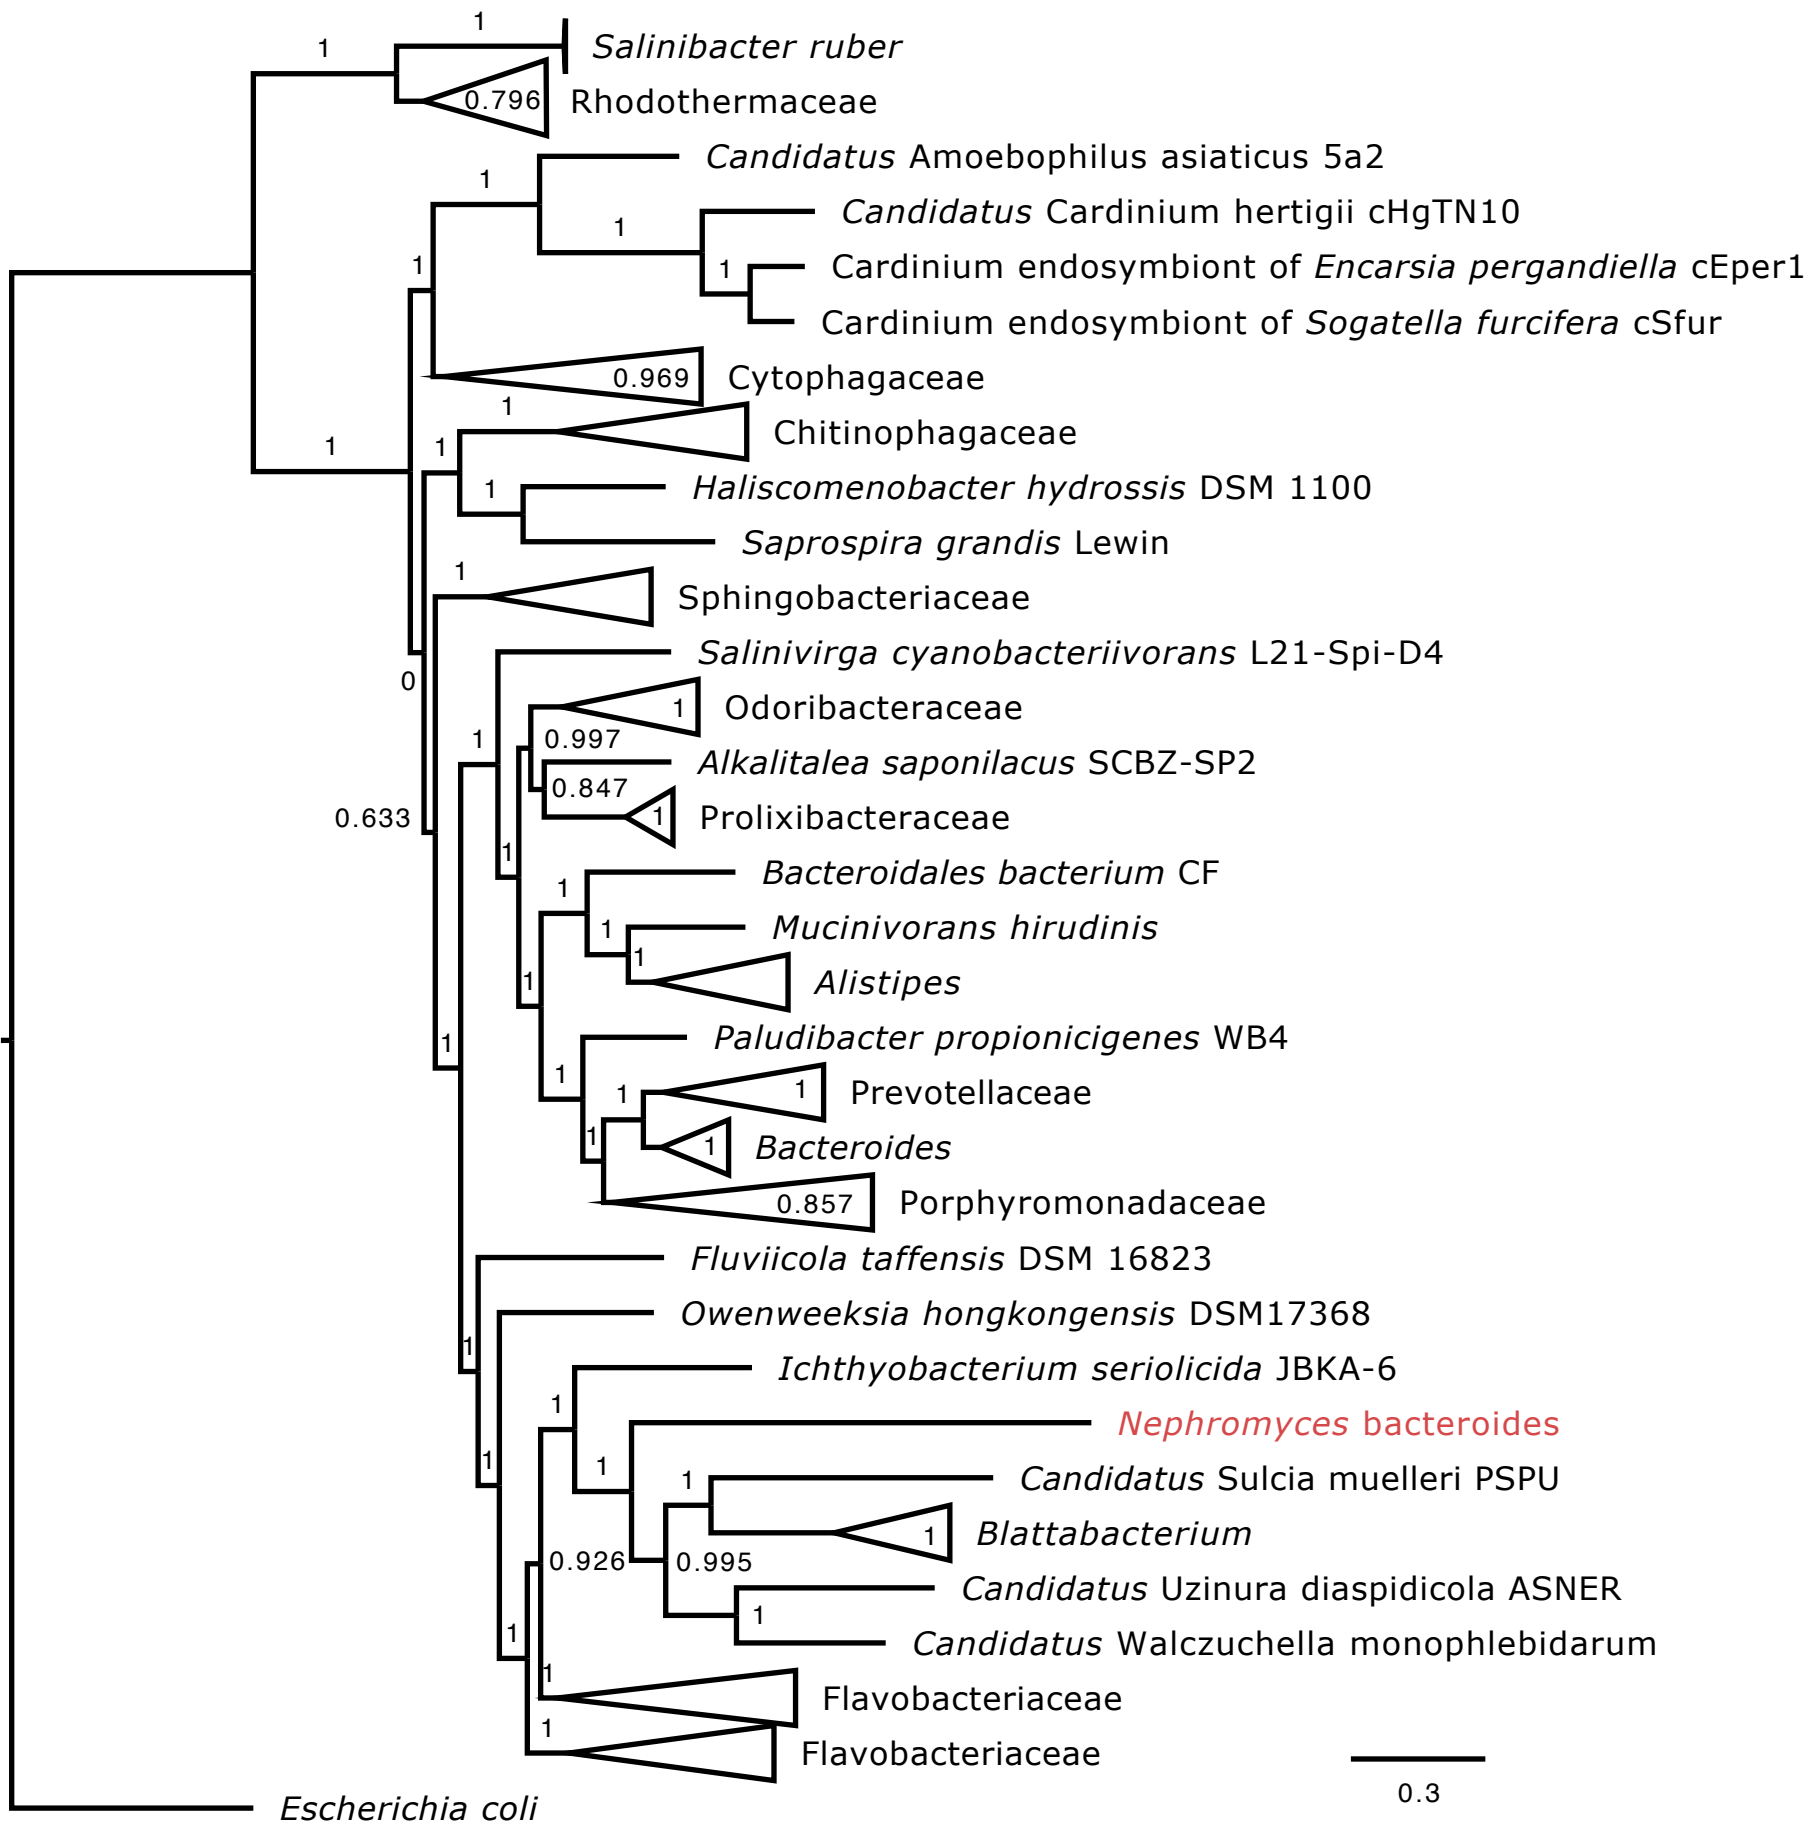

**Figure S3: Betaproteobacteria Phylogeny. Related to Figure 4.**

Maximum likelihood tree of 203 genes and 471 genomes from betaproteobacteria analysed in the GToTree pipeline with proportion of 1000 bootstrap replicates indicated at each node.

*Escherichia coli* was used as an outgroup.

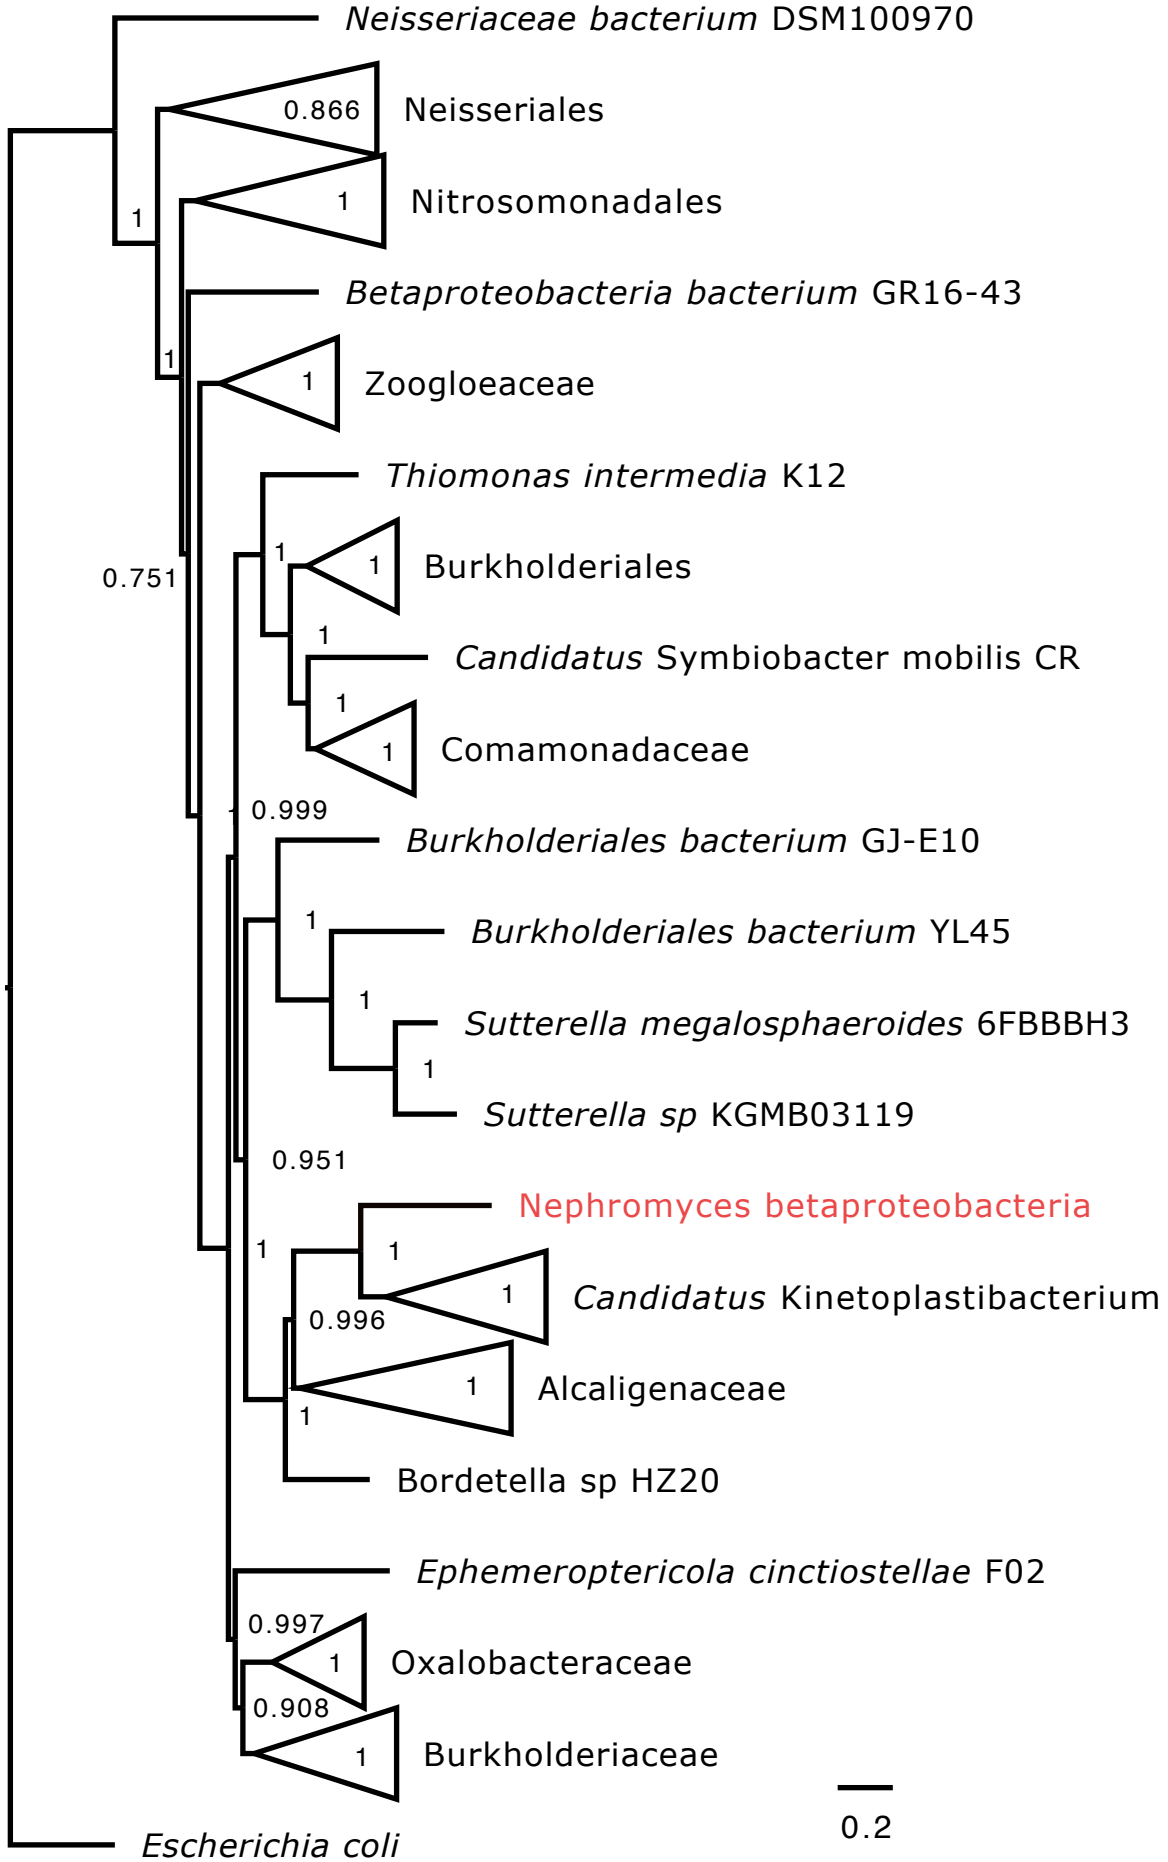

*Neisseriaceae bacterium DSM100970*

0.866 *Neisseriales*

1 *Nitrosomonadales*

*Betaproteobacteria bacterium GR16-43*

1 *Zoogloeaceae*

*Thiomonas intermedia K12*

1 *Burkholderiales*

*Candidatus Symbiobacter mobilis CR*

1 *Comamonadaceae*

0.999 *Burkholderiales bacterium GJ-E10*

1 *Burkholderiales bacterium YL45*

1 *Sutterella megalosphaeroides 6FBBBH3*

1 *Sutterella sp KGMB03119*

0.951 *Nephromyces betaproteobacteria*

1 *Candidatus Kinetoplastibacterium*

0.996 *Alcaligenaceae*

1 *Bordetella sp HZ20*

*Ephemeropticola cinctiostellae F02*

0.997 *Oxalobacteraceae*

0.908 *Burkholderiaceae*

*Escherichia coli*

0.2

**Figure S4: Bacteroidetes Phylogeny. Related to Figure 4.**

Maximum likelihood tree of 90 genes and 388 genomes from Bacteroidetes from the GToTree pipeline with bootstrap values. *Escherichia coli* was used as an outgroup.
